# Supplementary material for: Percolative ceramic composites with giant dielectric constants and low dielectric losses
Source: Royal Society of Chemistry journal article supplement (doi:10.1039/b820815h), 2009-04-29
Supplement: b820815h.pdf [file b820815h.pdf]

## Supporting Information

In this text, we would like to supply some additional supplemental information which may help the understanding of the paper. The images below are related to the microstructure of the Ag/BST/Pb-B composites.

### Part 1

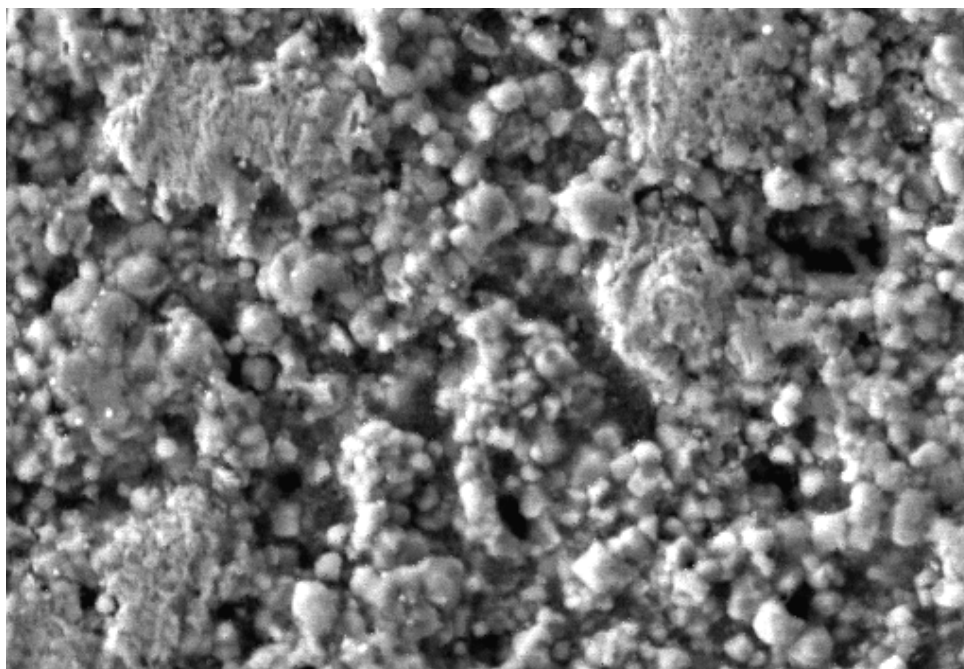

20μm

电子图像 1

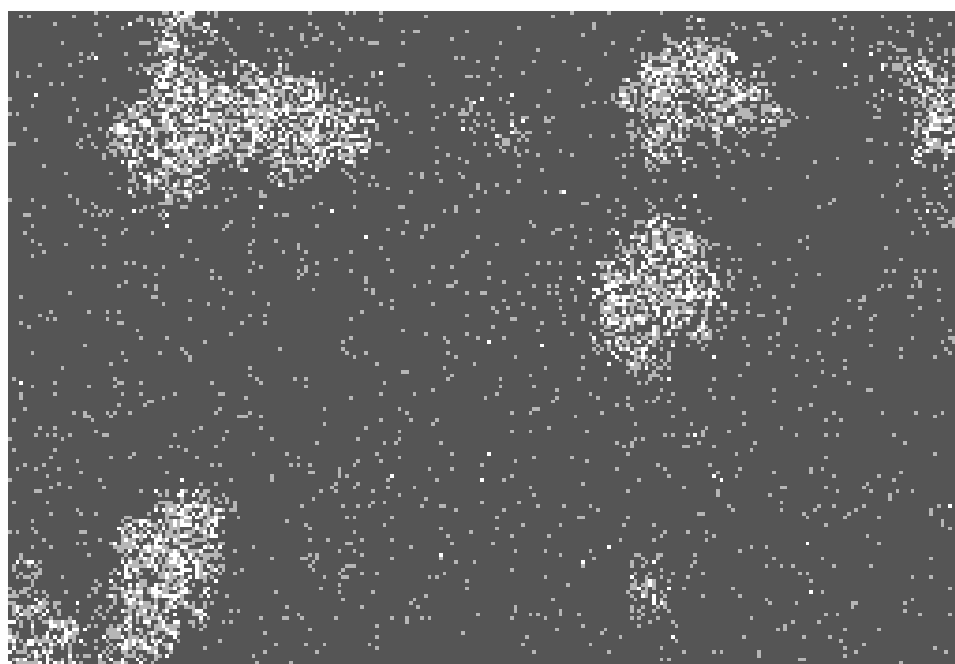

Ag La1

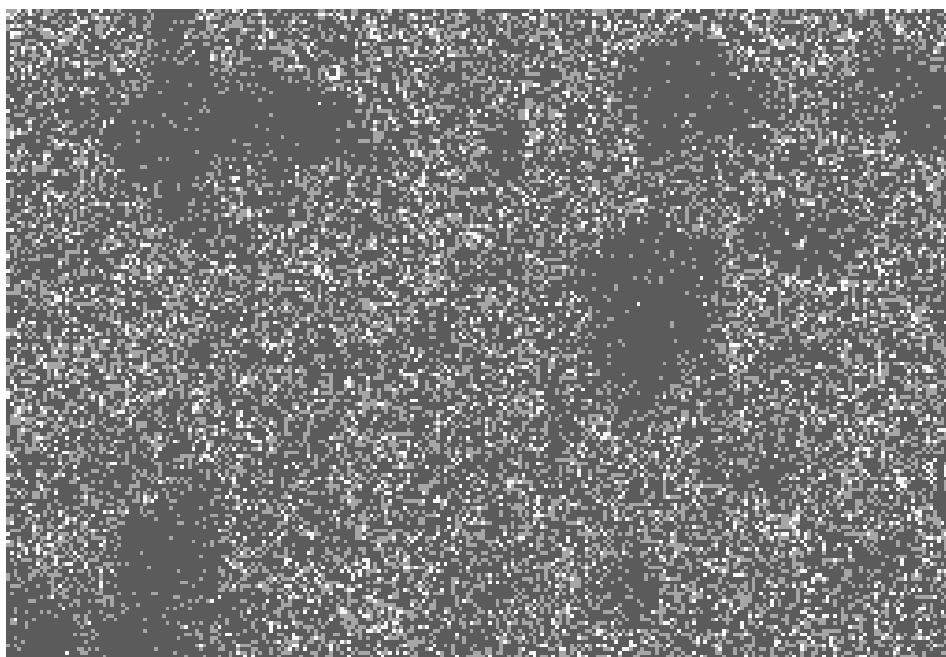

Ti Ka1

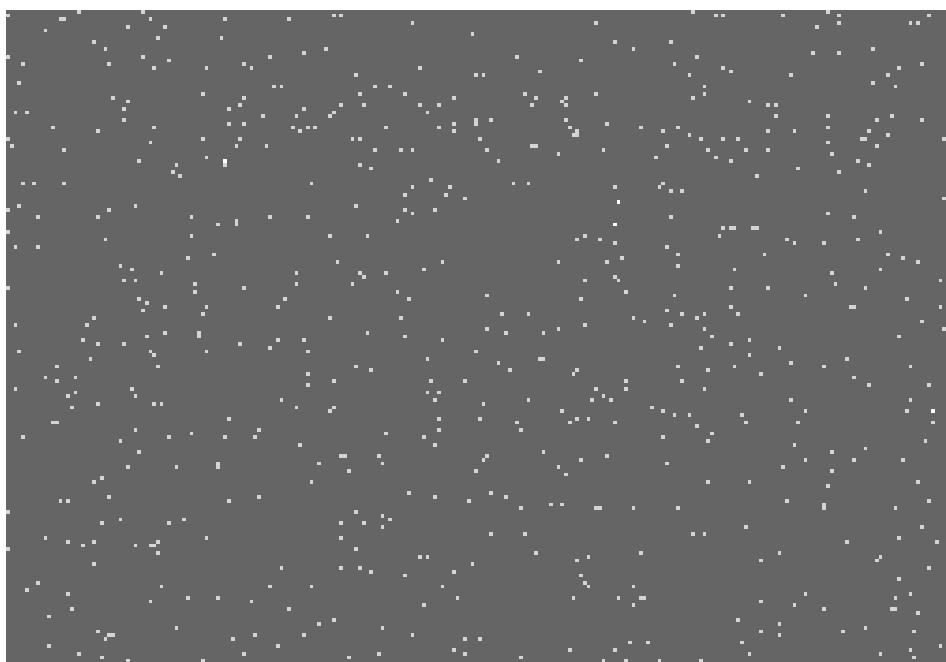

Pb La1

The 4 figures above show the SEM micrograph and EDX maps of the polished surface of the Ag/BST/PbO-B<sub>2</sub>O<sub>3</sub> composite with Ag volume fraction  $f=0.18$ . From the first and two figures, we conclude Ag exists as either aggregations with average size of 10  $\mu\text{m}$  or smaller particles and both of them are homogeneously dispersed in the matrix.

## Part 2

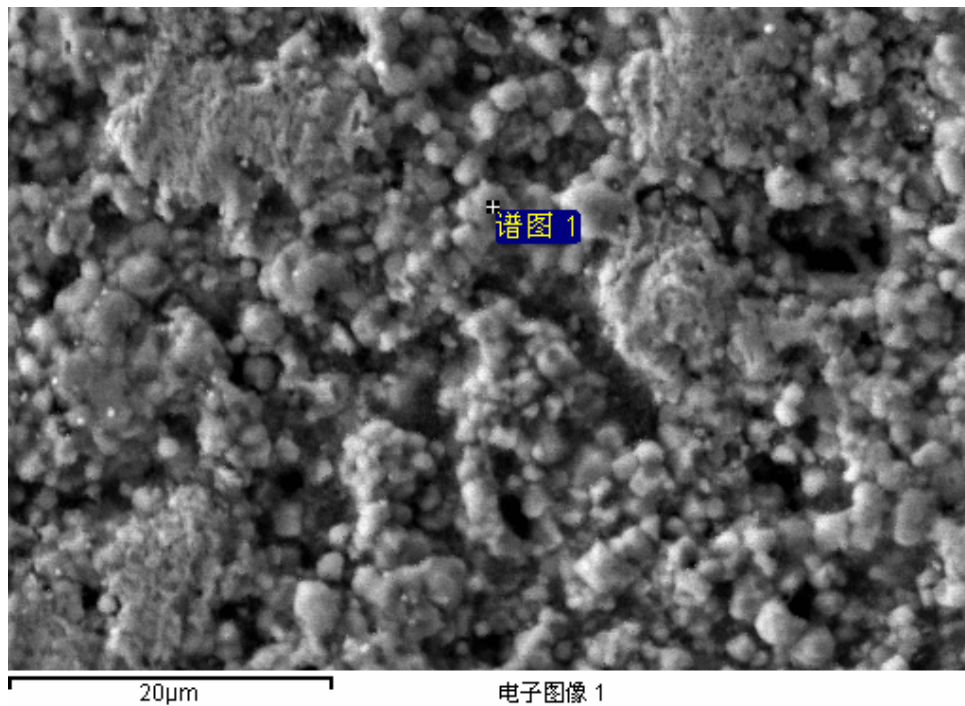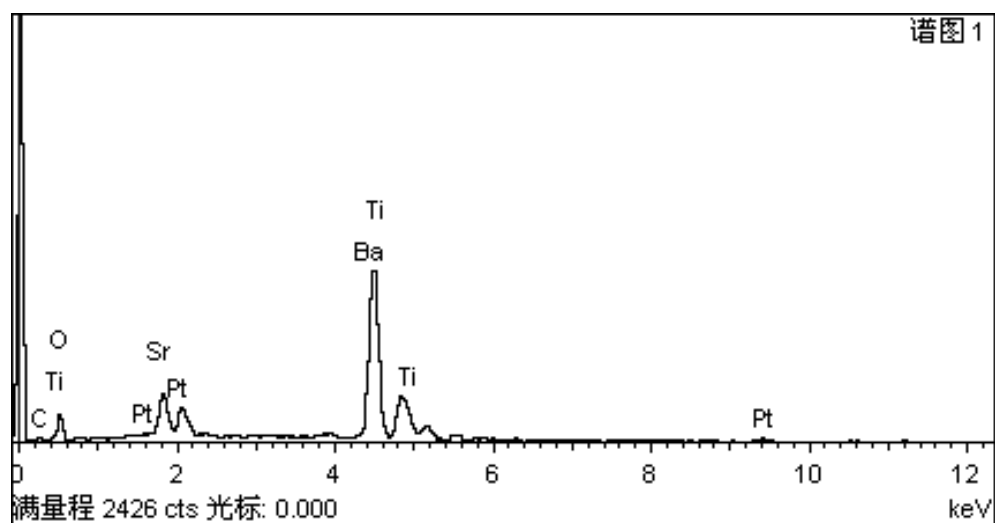

The above two figures are the SEM micrograph and EDX spectrum of the polished surface of the Ag/BST/PbO-B<sub>2</sub>O<sub>3</sub> composite with Ag volume fraction  $f=0.18$ . The EDX spectrum implies that the region being detected has composition similar to pure BST.

### Part 3

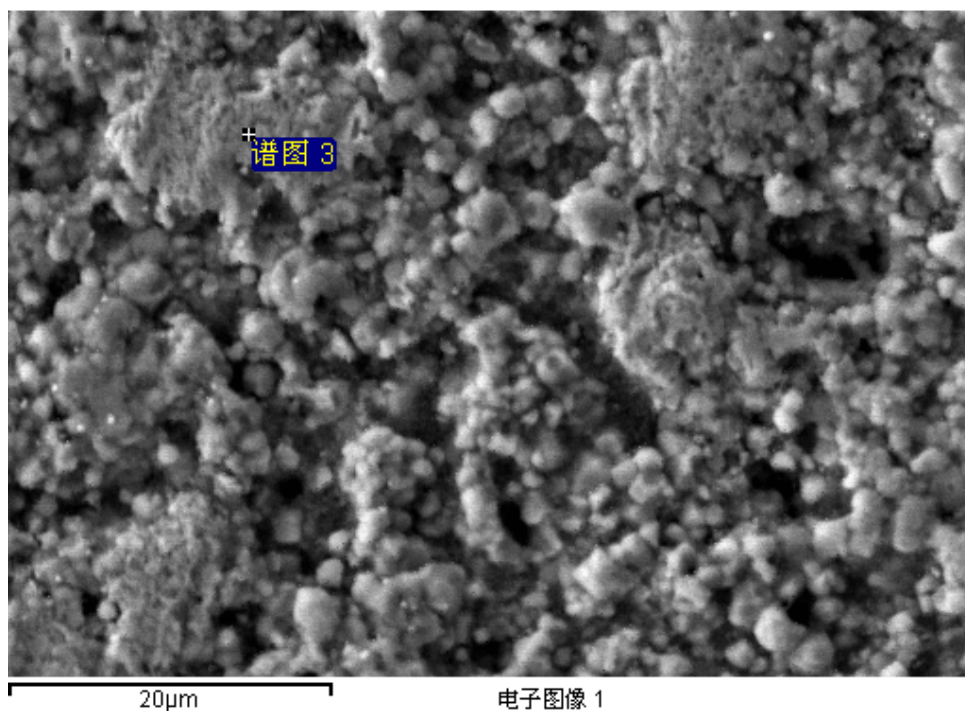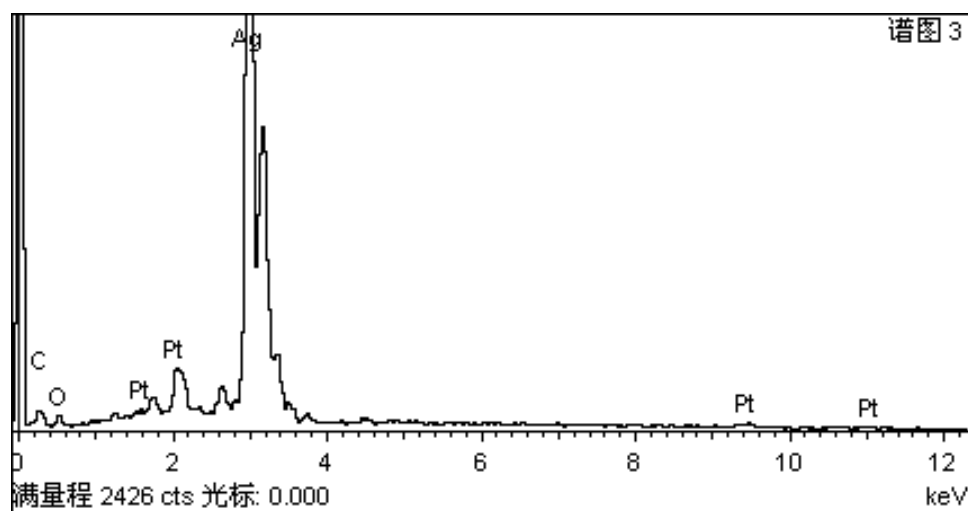

The above two figures are the SEM micrograph and EDX spectrum of the polished surface of the Ag/BST/PbO-B<sub>2</sub>O<sub>3</sub> composite with Ag volume fraction  $f=0.18$ . The EDX spectrum implies that the region being detected has composition similar to pure Ag and this further confirms the distribution and aggregation of Ag.

### Part 4

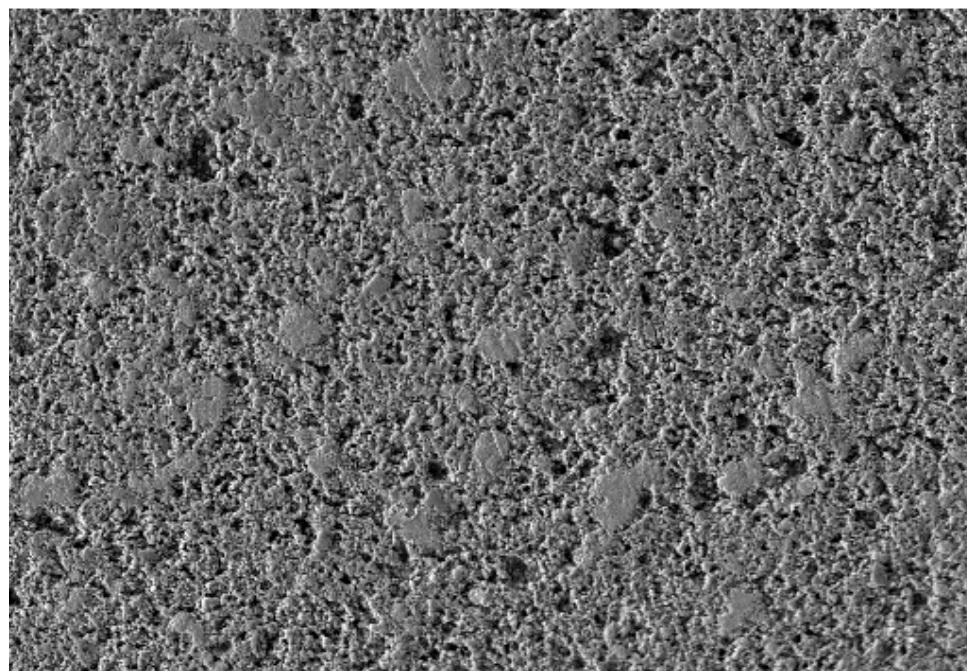

100µm

电子图像 1

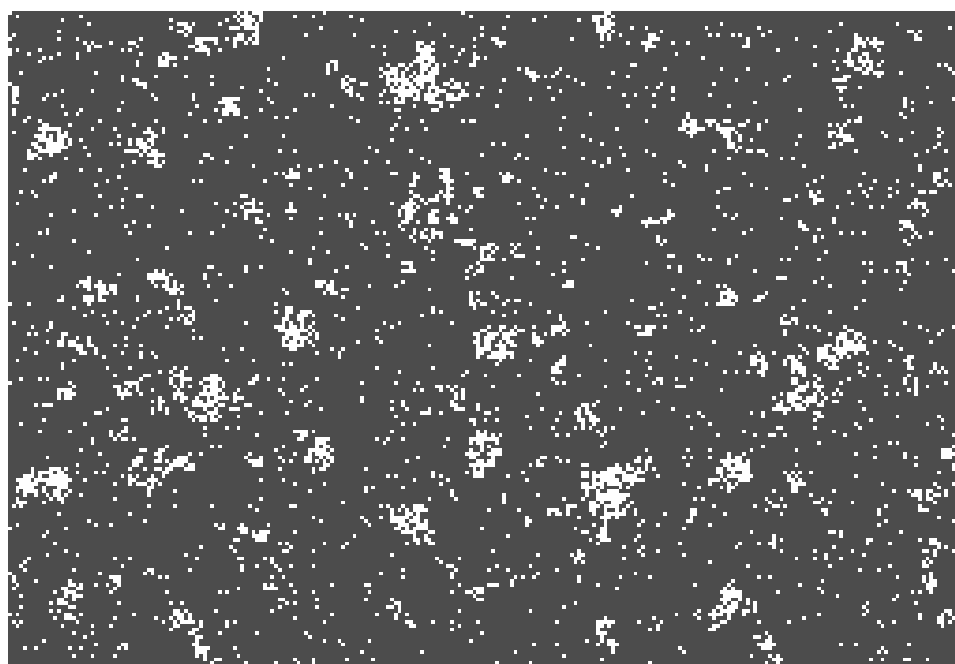

Ag La1

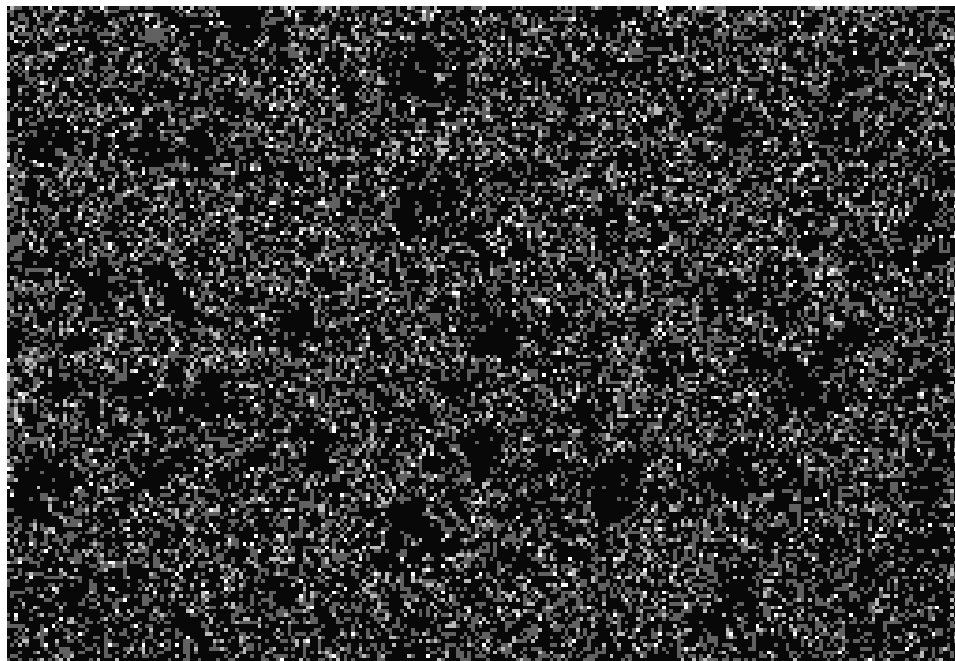

Ti Ka1

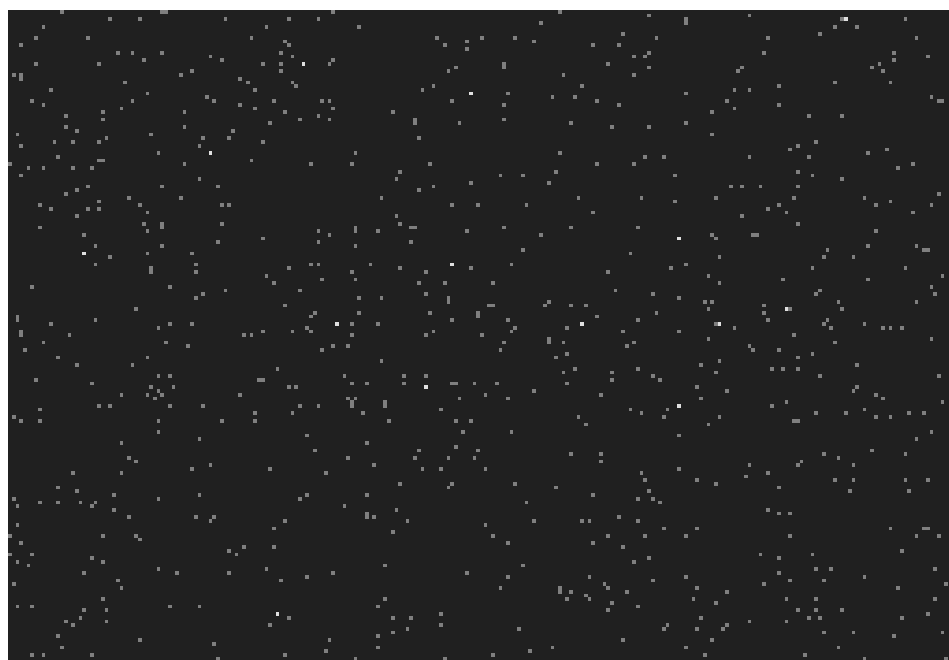

The 4 figures above show the SEM micrograph and EDX maps of the polished surface of the Ag/BST/PbO-B<sub>2</sub>O<sub>3</sub> composite with Ag volume fraction  $f=0.18$  with magnification 20 times less than those of Part 1. This further confirms the conclusion of Part 1.
